# Supplementary material
Source: publisher site journal article supplement (https://www.dovepress.com/article/581258)
Supplement: Supplementary file 1 [file 581258%20Revised%20Figure%20S1.docx]

MDV database

April 2008–March 2025

N = 52,336,073

≥1 elranatamab hospital claim on or after March 26, 2024 (index date)

N = 253

≥1 MM diagnosis before the index date (ie, start of treatment)

N = 253

≥18 years of age as of the index date (ie, start of treatment)

N = 253

No evidence of administration of treatment as part of a clinical triala

N = 253

Total number of RW elranatamab patients

N = 253

No hospital claim for elranatamab on or after March 26, 2024

N = 52,335,820

No MM diagnosis before the index date (ie, start of treatment)

N = 0

<18 years of age as of the index date

N = 0

Evidence of administration of treatment as part of a clinical triala

N = 0

Figure S1: EVEREST sample selection. a Patients with clinical trial evidence flagged from ICD10 codes, MDV receipt codes or hospitalization information and occurring between first and last elranatamab administration were excluded.

MDV, Medical Data vision; MM, multiple myeloma; RW, real-world
